# Supplementary material for: Growth of single-crystalline SrNbO2N micron particles and assembling of particulate photoanodes
Source: Royal Society of Chemistry journal article supplement (doi:10.1039/d4ce00050a), 2024-01-01
Supplement: d4ce00050a1.pdf [file d4ce00050a1.pdf]

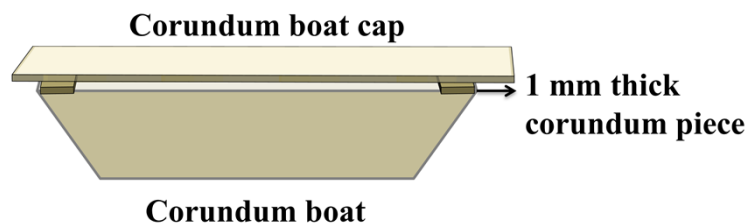

Fig. S1 Sample boat for transitional  $\text{NH}_3$  flow

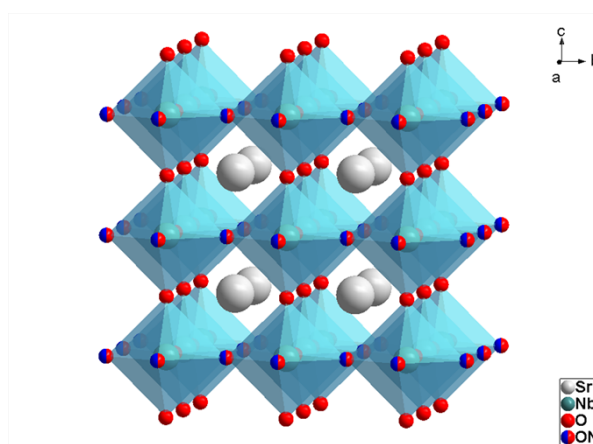

Fig. S2 Schematic illustrations of crystal structures for  $\text{SrNbO}_2\text{N}$ , generated from the reported crystal structure data file <sup>1</sup>

1. M. Yang, J. Oró-Solé, J. A. Rodgers, A. B. Jorge, A. Fuertes and J. P. Attfield, *Nat. Chem.*, 2011, **3**, 47-52.

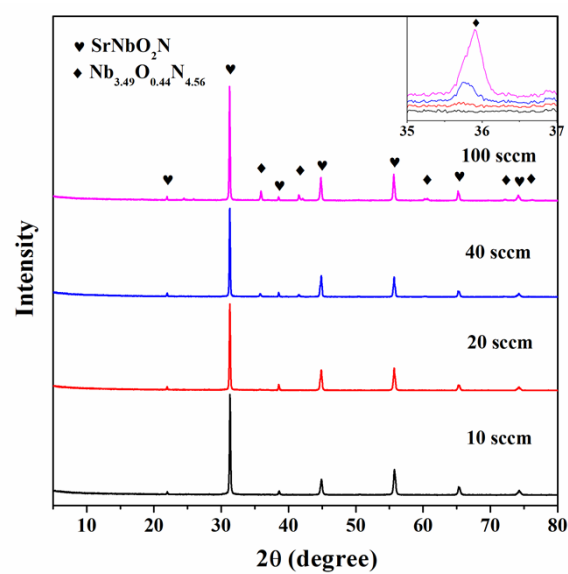

Fig. S3 XRD patterns of samples prepared via thermal ammonolysis at varied direct  $\text{NH}_3$  flow rates with  $\text{Sr}_5\text{Nb}_4\text{O}_{15}:\text{NaCl}$  molar ratio of 1:80

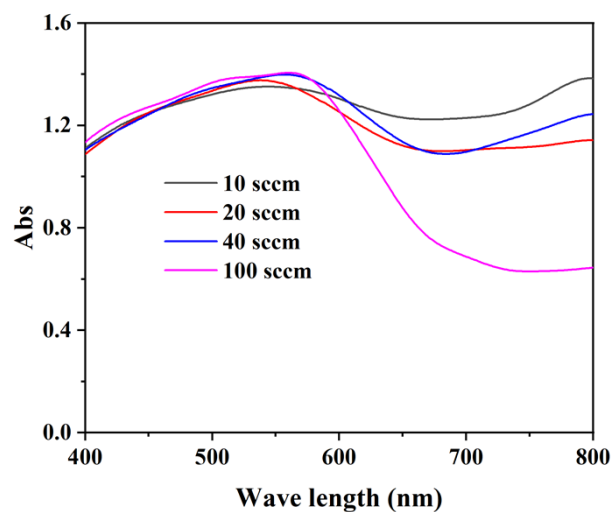

Fig. S4 UV-Vis diffuse reflectance spectra of  $\text{SrNbO}_2\text{N}$  prepared at varied rates of direct  $\text{NH}_3$  flow with  $\text{Sr}_5\text{Nb}_4\text{O}_{15}:\text{NaCl}$  molar ratio of 1:80

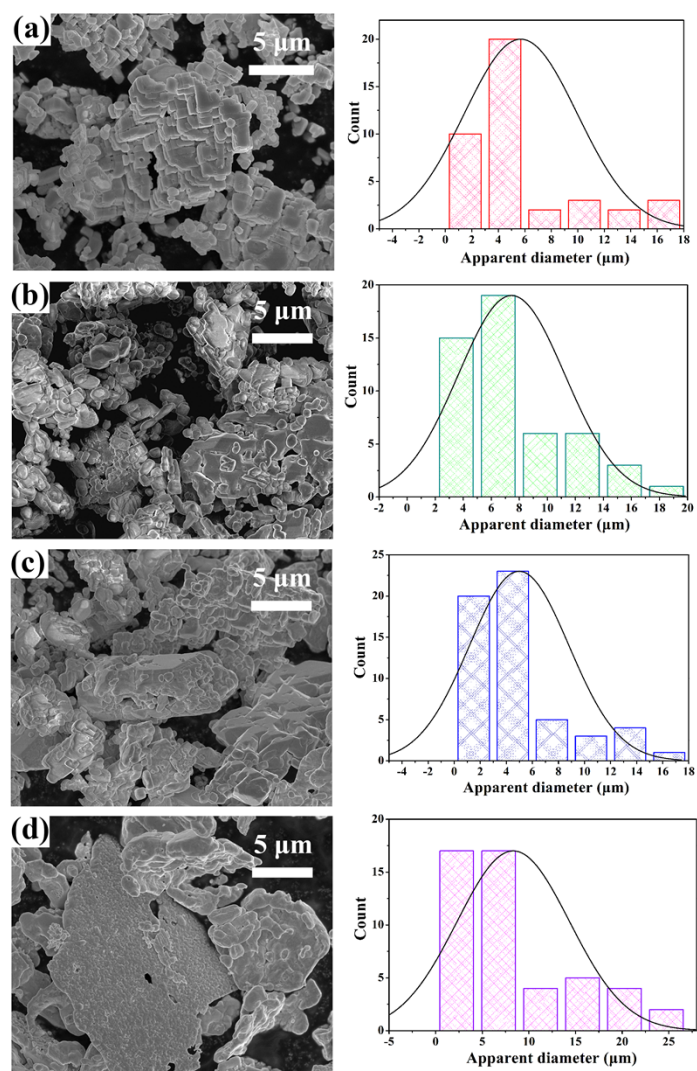

Fig. S5 SEM images of  $\text{SrNbO}_2\text{N}$  prepared with  $\text{Sr}_5\text{Nb}_4\text{O}_{15}:\text{NaCl}$  molar ratio of 1:80 at varied  $\text{NH}_3$  flow rates, (a) 100 sccm, (b) 40 sccm, (c) 20 sccm and (d) 10 sccm.

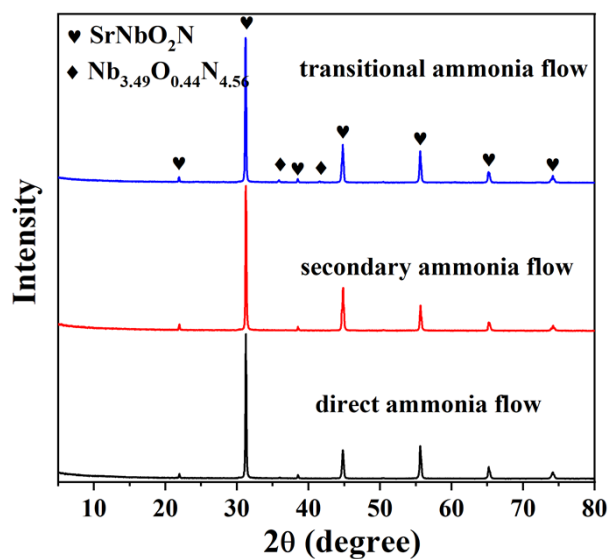

Fig. S6 XRD patterns of SrNbO<sub>2</sub>N powders prepared with (a) a direct NH<sub>3</sub> flow and Sr<sub>5</sub>Nb<sub>4</sub>O<sub>15</sub>:NaCl molar ratio of 1:40, (b) a secondary flow and molar ratio of 1:80, and (c) a transitional flow and molar ratio of 1:80 for assembling photoanodes

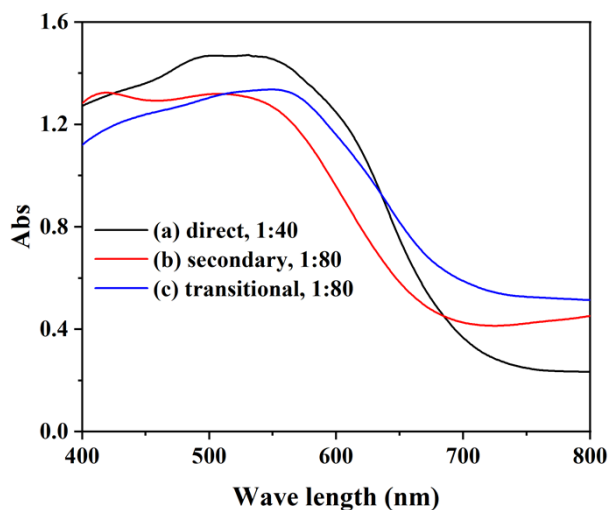

Fig. S7 UV-Vis diffuse reflectance spectrum of SrNbO<sub>2</sub>N powders prepared with (a) a direct NH<sub>3</sub> flow and Sr<sub>5</sub>Nb<sub>4</sub>O<sub>15</sub>:NaCl molar ratio of 1:40, (b) a secondary flow and molar ratio of 1:80, and (c) a transitional flow and molar ratio of 1:80 for assembling photoanodes
